# Supplementary material for: “I don’t Know what I Would do Without it” How Life Science Graduate Students Describe Resource Value
Source: Atypon-hosted journal article supplement (doi:10.1187/cbe.22-11-0241), 2023-09-26
Supplement: combinedsupmats.pdf [file combinedsupmats.pdf]

# Supplemental Material

*CBE—Life Sciences Education*

Weatherton *et al.*

**Table S1:** Participant demographics (N=492)

| Demographic Characteristic       |                       | Number of participants | Percentage |
|----------------------------------|-----------------------|------------------------|------------|
| <i>Year in program</i>           | 1 <sup>st</sup>       | 110                    | 22.36%     |
|                                  | 2 <sup>nd</sup>       | 118                    | 23.98%     |
|                                  | 3 <sup>rd</sup>       | 93                     | 18.90%     |
|                                  | 4 <sup>th</sup>       | 82                     | 16.67%     |
|                                  | 5 <sup>th</sup>       | 52                     | 10.57%     |
|                                  | 6 <sup>th</sup>       | 27                     | 5.49%      |
|                                  | 7 <sup>th</sup>       | 6                      | 1.22%      |
|                                  | 8+                    | 4                      | 0.81%      |
| <i>Gender identity</i>           | Woman                 | 348                    | 70.73%     |
|                                  | Man                   | 124                    | 25.20%     |
|                                  | Gender non-conforming | 20                     | 4.07%      |
| <i>College generation status</i> | Continuing generation | 234                    | 47.56%     |
|                                  | First generation      | 251                    | 51.02%     |
|                                  | Prefer not to answer  | 7                      | 1.42%      |
| <i>Racial identity</i>           | White                 | 350                    | 71.14%     |
|                                  | Nonwhite              | 142                    | 28.86%     |

**Table S2:** List of 34 resources provided to survey participants

|                                           |
|-------------------------------------------|
| Advisor                                   |
| University courses                        |
| Online academic journals                  |
| Departmental faculty                      |
| Friends                                   |
| Electronic resources                      |
| Other graduate students                   |
| Lab mates                                 |
| Academic stipend                          |
| Departmental seminars                     |
| Research collaborators                    |
| University library                        |
| Conferences                               |
| Family members                            |
| Significant other                         |
| Grants                                    |
| University health center                  |
| University-provided research facilities   |
| Departmental administrators               |
| Social media                              |
| Departmental graduate student association |

*Student perceptions of resource value – Supplementary Material*  
*Weatherton, Schussler, & Von der Mehden*

|                                             |
|---------------------------------------------|
| Previous mentors                            |
| University-sponsored events                 |
| Therapist or other mental health counseling |
| University gym                              |
| Travel funds                                |
| University sponsored workshops              |
| University transit system                   |
| Special interest student organizations      |
| University writing center                   |
| Alumni network                              |
| University career center                    |
| Publishing funds                            |
| International student center                |

*Table S3:* Number of participants within each demographic category that selected a resource as one of their top three ‘most important’.

| <b>RESOURCE</b>                             | <b>n</b> | <b>COLLEGE<br/>GENERATION<br/>STATUS</b> | <b>GENDER</b> | <b>YEAR</b> | <b>RACE</b> |
|---------------------------------------------|----------|------------------------------------------|---------------|-------------|-------------|
| Advisor                                     | 94       |                                          |               |             | Nonwhite    |
| Academic stipend                            | 74       |                                          |               |             | Nonwhite    |
| Significant other                           | 38       |                                          |               |             | Nonwhite    |
| Lab mates                                   | 31       |                                          |               |             | Nonwhite    |
| Friends                                     | 25       |                                          |               |             | Nonwhite    |
| Online academic journals                    | 22       |                                          |               |             | Nonwhite    |
| University courses                          | 16       |                                          |               |             | Nonwhite    |
| Electronic resources                        | 14       |                                          |               |             | Nonwhite    |
| Other graduate students                     | 14       |                                          |               |             | Nonwhite    |
| Family members                              | 13       |                                          |               |             | Nonwhite    |
| Therapist or other mental health counseling | 11       |                                          |               |             | Nonwhite    |

*Student perceptions of resource value – Supplementary Material*  
*Weatherton, Schussler, & Von der Mehden*

|                                         |     |  |  |  |          |
|-----------------------------------------|-----|--|--|--|----------|
| Departmental faculty                    | 9   |  |  |  | Nonwhite |
| University health center                | 7   |  |  |  | Nonwhite |
| Grants                                  | 6   |  |  |  | Nonwhite |
| Research collaborators                  | 6   |  |  |  | Nonwhite |
| University gym                          | 5   |  |  |  | Nonwhite |
| University-provided research facilities | 5   |  |  |  | Nonwhite |
| University library                      | 4   |  |  |  | Nonwhite |
| Departmental administrators             | 3   |  |  |  | Nonwhite |
| Special interest student organizations  | 3   |  |  |  | Nonwhite |
| University transit system               | 3   |  |  |  | Nonwhite |
| Conferences                             | 2   |  |  |  | Nonwhite |
| Previous mentors                        | 2   |  |  |  | Nonwhite |
| Departmental seminars                   | 1   |  |  |  | Nonwhite |
| University career center                | 1   |  |  |  | Nonwhite |
| Advisor                                 | 239 |  |  |  | White    |
| Academic stipend                        | 205 |  |  |  | White    |
| Significant other                       | 83  |  |  |  | White    |
| Online academic journals                | 78  |  |  |  | White    |
| Lab mates                               | 65  |  |  |  | White    |
| Friends                                 | 57  |  |  |  | White    |

*Student perceptions of resource value – Supplementary Material*  
*Weatherton, Schussler, & Von der Mehden*

|                                             |    |  |  |  |       |
|---------------------------------------------|----|--|--|--|-------|
| Other graduate students                     | 56 |  |  |  | White |
| Electronic resources                        | 54 |  |  |  | White |
| Therapist or other mental health counseling | 34 |  |  |  | White |
| Family members                              | 32 |  |  |  | White |
| Research collaborators                      | 30 |  |  |  | White |
| University-provided research facilities     | 29 |  |  |  | White |
| University courses                          | 23 |  |  |  | White |
| Grants                                      | 21 |  |  |  | White |
| University health center                    | 13 |  |  |  | White |
| Departmental faculty                        | 12 |  |  |  | White |
| Previous mentors                            | 6  |  |  |  | White |
| University library                          | 6  |  |  |  | White |
| University gym                              | 5  |  |  |  | White |
| Conferences                                 | 4  |  |  |  | White |
| Travel funds                                | 4  |  |  |  | White |
| University transit system                   | 2  |  |  |  | White |
| University writing center                   | 2  |  |  |  | White |
| Alumni network                              | 1  |  |  |  | White |

*Student perceptions of resource value – Supplementary Material*  
*Weatherton, Schussler, & Von der Mehden*

|                                             |     |                       |  |  |       |
|---------------------------------------------|-----|-----------------------|--|--|-------|
| Departmental graduate student association   | 1   |                       |  |  | White |
| Social media                                | 1   |                       |  |  | White |
| University sponsored workshops              | 1   |                       |  |  | White |
| Advisor                                     | 163 | Continuing generation |  |  |       |
| Academic stipend                            | 129 | Continuing generation |  |  |       |
| Significant other                           | 53  | Continuing generation |  |  |       |
| Lab mates                                   | 48  | Continuing generation |  |  |       |
| Online academic journals                    | 46  | Continuing generation |  |  |       |
| Friends                                     | 40  | Continuing generation |  |  |       |
| Electronic resources                        | 33  | Continuing generation |  |  |       |
| Family members                              | 25  | Continuing generation |  |  |       |
| Other graduate students                     | 25  | Continuing generation |  |  |       |
| University courses                          | 18  | Continuing generation |  |  |       |
| University-provided research facilities     | 18  | Continuing generation |  |  |       |
| Therapist or other mental health counseling | 16  | Continuing generation |  |  |       |
| Grants                                      | 14  | Continuing generation |  |  |       |

*Student perceptions of resource value – Supplementary Material*  
*Weatherton, Schussler, & Von der Mehden*

|                                           |     |                       |  |  |  |
|-------------------------------------------|-----|-----------------------|--|--|--|
| Research collaborators                    | 13  | Continuing generation |  |  |  |
| Departmental faculty                      | 11  | Continuing generation |  |  |  |
| University library                        | 6   | Continuing generation |  |  |  |
| University gym                            | 5   | Continuing generation |  |  |  |
| Previous mentors                          | 4   | Continuing generation |  |  |  |
| University health center                  | 4   | Continuing generation |  |  |  |
| Conferences                               | 3   | Continuing generation |  |  |  |
| Special interest student organizations    | 3   | Continuing generation |  |  |  |
| Alumni network                            | 1   | Continuing generation |  |  |  |
| Departmental administrators               | 1   | Continuing generation |  |  |  |
| Departmental graduate student association | 1   | Continuing generation |  |  |  |
| Departmental seminars                     | 1   | Continuing generation |  |  |  |
| Travel funds                              | 1   | Continuing generation |  |  |  |
| University sponsored workshops            | 1   | Continuing generation |  |  |  |
| University transit system                 | 1   | Continuing generation |  |  |  |
| Advisor                                   | 163 | First generation      |  |  |  |
| Academic stipend                          | 146 | First generation      |  |  |  |

*Student perceptions of resource value – Supplementary Material*  
*Weatherton, Schussler, & Von der Mehden*

|                                             |    |                  |  |  |  |
|---------------------------------------------|----|------------------|--|--|--|
| Significant other                           | 65 | First generation |  |  |  |
| Online academic journals                    | 53 | First generation |  |  |  |
| Lab mates                                   | 46 | First generation |  |  |  |
| Other graduate students                     | 45 | First generation |  |  |  |
| Friends                                     | 41 | First generation |  |  |  |
| Electronic resources                        | 35 | First generation |  |  |  |
| Therapist or other mental health counseling | 29 | First generation |  |  |  |
| Research collaborators                      | 22 | First generation |  |  |  |
| University courses                          | 21 | First generation |  |  |  |
| Family members                              | 19 | First generation |  |  |  |
| University health center                    | 16 | First generation |  |  |  |
| University-provided research facilities     | 15 | First generation |  |  |  |
| Grants                                      | 11 | First generation |  |  |  |
| Departmental faculty                        | 10 | First generation |  |  |  |
| University gym                              | 5  | First generation |  |  |  |
| Previous mentors                            | 4  | First generation |  |  |  |
| University transit system                   | 4  | First generation |  |  |  |



*Student perceptions of resource value – Supplementary Material*  
*Weatherton, Schussler, & Von der Mehden*

|                                        |     |                  |         |  |  |
|----------------------------------------|-----|------------------|---------|--|--|
| Conferences                            | 3   | First generation |         |  |  |
| Travel funds                           | 3   | First generation |         |  |  |
| University library                     | 3   | First generation |         |  |  |
| Departmental administrators            | 2   | First generation |         |  |  |
| University writing center              | 2   | First generation |         |  |  |
| Social media                           | 1   | First generation |         |  |  |
| University career center               | 1   | First generation |         |  |  |
| Academic stipend                       | 2   |                  | Agender |  |  |
| Special interest student organizations | 2   |                  | Agender |  |  |
| Electronic resources                   | 1   |                  | Agender |  |  |
| Friends                                | 1   |                  | Agender |  |  |
| Online academic journals               | 1   |                  | Agender |  |  |
| Previous mentors                       | 1   |                  | Agender |  |  |
| Significant other                      | 1   |                  | Agender |  |  |
| Advisor                                | 235 |                  | Women   |  |  |
| Academic stipend                       | 202 |                  | Women   |  |  |
| Significant other                      | 96  |                  | Women   |  |  |
| Online academic journals               | 72  |                  | Women   |  |  |
| Lab mates                              | 68  |                  | Women   |  |  |
| Friends                                | 58  |                  | Women   |  |  |

*Student perceptions of resource value – Supplementary Material*  
*Weatherton, Schussler, & Von der Mehden*

|                                             |    |  |       |  |  |
|---------------------------------------------|----|--|-------|--|--|
| Electronic resources                        | 47 |  | Women |  |  |
| Other graduate students                     | 47 |  | Women |  |  |
| Therapist or other mental health counseling | 38 |  | Women |  |  |
| Family members                              | 36 |  | Women |  |  |
| Research collaborators                      | 23 |  | Women |  |  |
| University courses                          | 22 |  | Women |  |  |
| Grants                                      | 20 |  | Women |  |  |
| University-provided research facilities     | 18 |  | Women |  |  |
| Departmental faculty                        | 16 |  | Women |  |  |
| University health center                    | 11 |  | Women |  |  |
| University library                          | 8  |  | Women |  |  |
| Conferences                                 | 4  |  | Women |  |  |
| Travel funds                                | 4  |  | Women |  |  |
| University gym                              | 4  |  | Women |  |  |
| University transit system                   | 4  |  | Women |  |  |
| Departmental administrators                 | 2  |  | Women |  |  |
| Previous mentors                            | 2  |  | Women |  |  |
| University writing center                   | 2  |  | Women |  |  |
| Alumni network                              | 1  |  | Women |  |  |

*Student perceptions of resource value – Supplementary Material*  
*Weatherton, Schussler, & Von der Mehden*

|                                             |    |  |              |  |  |
|---------------------------------------------|----|--|--------------|--|--|
| Departmental graduate student association   | 1  |  | Women        |  |  |
| Departmental seminars                       | 1  |  | Women        |  |  |
| Social media                                | 1  |  | Women        |  |  |
| Special interest student organizations      | 1  |  | Women        |  |  |
| University career center                    | 1  |  | Women        |  |  |
| University sponsored workshops              | 1  |  | Women        |  |  |
| Advisor                                     | 15 |  | Gender queer |  |  |
| Academic stipend                            | 14 |  | Gender queer |  |  |
| Lab mates                                   | 6  |  | Gender queer |  |  |
| Significant other                           | 6  |  | Gender queer |  |  |
| Other graduate students                     | 3  |  | Gender queer |  |  |
| Therapist or other mental health counseling | 3  |  | Gender queer |  |  |
| Electronic resources                        | 2  |  | Gender queer |  |  |
| Friends                                     | 2  |  | Gender queer |  |  |
| Online academic journals                    | 2  |  | Gender queer |  |  |
| University health center                    | 2  |  | Gender queer |  |  |
| Departmental faculty                        | 1  |  | Gender queer |  |  |
| Grants                                      | 1  |  | Gender queer |  |  |

*Student perceptions of resource value – Supplementary Material*  
*Weatherton, Schussler, & Von der Mehden*

|                                         |    |  |              |  |  |
|-----------------------------------------|----|--|--------------|--|--|
| Previous mentors                        | 1  |  | Gender queer |  |  |
| University courses                      | 1  |  | Gender queer |  |  |
| University-provided research facilities | 1  |  | Gender queer |  |  |
| Advisor                                 | 83 |  | Men          |  |  |
| Academic stipend                        | 61 |  | Men          |  |  |
| Online academic journals                | 25 |  | Men          |  |  |
| Lab mates                               | 22 |  | Men          |  |  |
| Friends                                 | 21 |  | Men          |  |  |
| Other graduate students                 | 20 |  | Men          |  |  |
| Electronic resources                    | 18 |  | Men          |  |  |
| Significant other                       | 18 |  | Men          |  |  |
| University courses                      | 16 |  | Men          |  |  |
| University-provided research facilities | 15 |  | Men          |  |  |
| Research collaborators                  | 13 |  | Men          |  |  |
| Family members                          | 9  |  | Men          |  |  |
| University health center                | 7  |  | Men          |  |  |
| Grants                                  | 6  |  | Men          |  |  |
| University gym                          | 6  |  | Men          |  |  |
| Departmental faculty                    | 4  |  | Men          |  |  |

*Student perceptions of resource value – Supplementary Material*  
*Weatherton, Schussler, & Von der Mehden*

|                                             |     |  |     |           |  |
|---------------------------------------------|-----|--|-----|-----------|--|
| Previous mentors                            | 4   |  | Men |           |  |
| Therapist or other mental health counseling | 4   |  | Men |           |  |
| Conferences                                 | 2   |  | Men |           |  |
| University library                          | 2   |  | Men |           |  |
| Departmental administrators                 | 1   |  | Men |           |  |
| University transit system                   | 1   |  | Men |           |  |
| Advisor                                     | 154 |  |     | Years 1-2 |  |
| Academic stipend                            | 126 |  |     | Years 1-2 |  |
| Significant other                           | 55  |  |     | Years 1-2 |  |
| Other graduate students                     | 46  |  |     | Years 1-2 |  |
| Online academic journals                    | 42  |  |     | Years 1-2 |  |
| Lab mates                                   | 39  |  |     | Years 1-2 |  |
| Friends                                     | 36  |  |     | Years 1-2 |  |
| University courses                          | 30  |  |     | Years 1-2 |  |
| Electronic resources                        | 27  |  |     | Years 1-2 |  |
| Family members                              | 22  |  |     | Years 1-2 |  |
| Therapist or other mental health counseling | 19  |  |     | Years 1-2 |  |
| University-provided research facilities     | 14  |  |     | Years 1-2 |  |

*Student perceptions of resource value – Supplementary Material*  
*Weatherton, Schussler, & Von der Mehden*

|                                           |     |  |  |           |  |
|-------------------------------------------|-----|--|--|-----------|--|
| Departmental faculty                      | 13  |  |  | Years 1-2 |  |
| Research collaborators                    | 10  |  |  | Years 1-2 |  |
| University health center                  | 10  |  |  | Years 1-2 |  |
| Grants                                    | 7   |  |  | Years 1-2 |  |
| University gym                            | 6   |  |  | Years 1-2 |  |
| University library                        | 6   |  |  | Years 1-2 |  |
| Previous mentors                          | 4   |  |  | Years 1-2 |  |
| Special interest student organizations    | 3   |  |  | Years 1-2 |  |
| University transit system                 | 3   |  |  | Years 1-2 |  |
| Departmental administrators               | 2   |  |  | Years 1-2 |  |
| Alumni network                            | 1   |  |  | Years 1-2 |  |
| Departmental graduate student association | 1   |  |  | Years 1-2 |  |
| University career center                  | 1   |  |  | Years 1-2 |  |
| Advisor                                   | 179 |  |  | Years 3+  |  |
| Academic stipend                          | 153 |  |  | Years 3+  |  |
| Significant other                         | 66  |  |  | Years 3+  |  |
| Online academic journals                  | 58  |  |  | Years 3+  |  |
| Lab mates                                 | 57  |  |  | Years 3+  |  |
| Friends                                   | 46  |  |  | Years 3+  |  |
| Electronic resources                      | 41  |  |  | Years 3+  |  |

*Student perceptions of resource value – Supplementary Material*  
*Weatherton, Schussler, & Von der Mehden*

|                                             |    |  |  |          |  |
|---------------------------------------------|----|--|--|----------|--|
| Research collaborators                      | 26 |  |  | Years 3+ |  |
| Therapist or other mental health counseling | 26 |  |  | Years 3+ |  |
| Other graduate students                     | 24 |  |  | Years 3+ |  |
| Family members                              | 23 |  |  | Years 3+ |  |
| Grants                                      | 20 |  |  | Years 3+ |  |
| University-provided research facilities     | 20 |  |  | Years 3+ |  |
| University health center                    | 10 |  |  | Years 3+ |  |
| University courses                          | 9  |  |  | Years 3+ |  |
| Departmental faculty                        | 8  |  |  | Years 3+ |  |
| Conferences                                 | 6  |  |  | Years 3+ |  |
| Previous mentors                            | 4  |  |  | Years 3+ |  |
| Travel funds                                | 4  |  |  | Years 3+ |  |
| University gym                              | 4  |  |  | Years 3+ |  |
| University library                          | 4  |  |  | Years 3+ |  |
| University transit system                   | 2  |  |  | Years 3+ |  |
| University writing center                   | 2  |  |  | Years 3+ |  |
| Departmental administrators                 | 1  |  |  | Years 3+ |  |
| Departmental seminars                       | 1  |  |  | Years 3+ |  |
| Social media                                | 1  |  |  | Years 3+ |  |

*Student perceptions of resource value – Supplementary Material*  
*Weatherton, Schussler, & Von der Mehden*

|                                |   |  |  |          |  |
|--------------------------------|---|--|--|----------|--|
| University sponsored workshops | 1 |  |  | Years 3+ |  |
|--------------------------------|---|--|--|----------|--|
